# Supplementary material
Source: PubMed Central journal article supplement (PMC5462891)
Supplement: NIHMS826155-supplement-01.pdf [file NIHMS826155-supplement-01.pdf]

**Figure S1. BCG vaccination induces expansion of memory-like NK cells.** C57BL/6 mice (5 mice per group) were given 100  $\mu$ l of PBS (unimmunized) or immunized subcutaneously with  $10^6$  CFU of BCG in 100  $\mu$ l of PBS. One and three months after vaccination, spleen, and peripheral lymph node cells were isolated, pooled, and cultured, with  $\gamma$ -irradiated *M. tb* H37Rv or Ag85a. After 5 days, CD3-NKp46+CD27+ and CD3-NKp46+CD27+KLRG1+ cells were measured by flow cytometry. **(A)** Expansion of CD3-NKp46+CD27+ cells one month after BCG vaccination. **(B)** Expansion of CD3-NKp46+CD27+ cells three months after BCG vaccination. **(C)** Expansion of CD3-NKp46+CD27+KLRG1+ cells one month after BCG vaccination. **(D)** Expansion of CD3-NKp46+CD27+KLRG1+ cells three month after BCG vaccination. Mean values and SEs are shown. Data are representative of two independent experiments.

**Figure S2. Memory-like NK cells expand after BCG vaccination and challenge with *M. tb* H37Rv.** C57BL/6 mice (20 mice per group) were given 100  $\mu$ l of PBS or immunized subcutaneously with  $10^6$  CFU of BCG in 100  $\mu$ l of PBS. After thirty days, mice were challenged with 75-100 CFU of *M. tb* H37Rv by aerosol. At weekly intervals up to 4 weeks, five mice in each group were sacrificed, and absolute number of CD3-NKp46+27+ cells was determined by flow cytometry and fold change compared to uninfected control mice was shown. **(A)** Lung **(B)** spleen. Mean values and SEs are shown. Data are representative of two independent experiments..

**Figure S3. Expansion of memory-like NK cells in BCG-vaccinated mice depends on IL-21.** **(A)** C57BL/6 mice were treated with PBS or immunized subcutaneously with  $10^6$  CFU of BCG in 100  $\mu$ l of PBS. Three month after vaccination, spleen, and peripheral lymph node cells were pooled and cells were cultured with or without Ag85, in the presence of isotype-matched control antibodies or neutralizing antibodies to IL-21. After five days, expansion of CD3-

NKp46+CD27+ cells were measured by flow cytometry. **(B)** C57BL/6 mice were treated with PBS or immunized subcutaneously with  $10^6$  CFU of *BCG* in 100  $\mu$ l of PBS. Three month after vaccination, spleen, and peripheral lymph node cells were pooled and transfected with either IL-21 or scrambled siRNA (control siRNA) and cultured with or without Ag85. After 72 hrs, cells were lysed and IL-21 mRNA levels was measured real time PCR. **(C)** Wild type C57BL/6 mice were sacrificed and spleen, and peripheral lymph node cells were pooled and cultured with or without Ag85, in the presence or absence of rIL-21. Mean values and SEs are shown. Data are representative of two independent experiments.

**Figure S4. Memory-like NK cells enhance cytokine and anti-microbial peptide expression in *M. tb*-infected mice lungs.** C57BL/6 mice (5 mice per group) were immunized subcutaneously with  $10^6$  CFU of BCG in 100  $\mu$ l of PBS. After one month, NK cells from pooled spleens and peripheral lymph node cells were isolated and adoptively transferred ( $1 \times 10^6$  cells once on day 0 of infection) to *M. tb* H37Rv-infected C57BL/6 mice. Infected mice in all panels were sacrificed thirty days after infection, RNA was extracted from lungs cytokine and anti-microbial peptide mRNA was quantified by real-time PCR. Data are representative of two independent experiments.

**Figure S5. Expansion of memory-like NK cells in individuals with LTBI depends on IL-21.** PBMC from 5 individuals with LTBI and 5 individuals without LTBI were cultured, with or without ESAT-6. **(A)** After 5 days, the percentages of proliferating CD3-NKp46+CD27+KLRG1+ cells were measured by flow cytometry. **(B)** PBMC were transfected with either IL-21 or scrambled siRNA (control siRNA) and cultured with or without ESAT-6. After five days, expansion of CD3-NKp46+CD27+KLRG1+ cells were measured by flow cytometry. **(C)** PBMC were cultured same as in panel B and cells were lysed and IL-21 mRNA levels was measured real time PCR. Five independent experiments were performed. Mean values and SEs are shown. **Table. S1:** List of mouse primers used for the study

| S. No. | Name of the Gene | Primer Sequence |
|--------|------------------|-----------------|
|        |                  |                 |

|    |                                |                                                                          |
|----|--------------------------------|--------------------------------------------------------------------------|
| 1. | CD3                            | Forward: ATGCGGTGGAACACTTTCTGG<br>Reverse: GCACGTCAACTCTACACTGGT         |
| 2. | $\beta$ -Defensin              | Forward: TCTTGTTCTTGGTGCCTGCT<br>Reverse: CGACCGCTATTAGAACATCGAC         |
| 3. | IL-21                          | Forward: GCCTCCTGATTAGACTTCGTAC<br>Reverse: CAGGCAAAGCTGCATGCTCAC        |
| 4. | $\beta$ -actin                 | Forward: CTCTGGCTCCTAGCACCATGAAGA<br>Reverse: GTAAAACGAAGCTCAGTAACAGTCCG |
| 5. | IL-1 $\beta$                   | Forward: CAACCAACAAGTGATATTCTCCATG<br>Reverse: GATCCACACTCTCCAGCT        |
| 6. | IL-12                          | Forward: CTTAGCCAGTCCCGAAACCT<br>Reverse: TTGGTCCCGTGTGATGTCT            |
| 7. | IL-18                          | Forward: GCCTCAAACCTTCCAAATCA<br>Reverse: TGGATCCATTTCTCAAAGG            |
| 8. | TNF- $\alpha$                  | Forward: CATCTTCTCAAATTCGAGTGACAA<br>Reverse: TGGGAGTAGACAAGGTACAACCC    |
| 9  | <i>IFN-<math>\gamma</math></i> | Forward: TCAAGTGGCATAGATGTGGAAGAA<br>Reverse: TGGCTCTGCAGGATTTTCATG      |
